# Supplementary material
Source: MDPI journal article supplement (https://www.mdpi.com/2071-1050/15/22/15771)
Supplement: s1 [file s1]

## SUPPLEMENTARY MATERIAL

**Table S1.** Summary of the analysis of variance for macro and micronutrients in leaves of different eucalyptus species. Nutrients: nitrogen (N), phosphorus (P), potassium (K), calcium (Ca), magnesium (Mg), sulfur (S), boron (B), copper (Cu), iron (Fe), manganese (Mn) and zinc (Zn).

| SV           | DF | Mean Square    |       |         |         |       |                |        |       |           |        |         |
|--------------|----|----------------|-------|---------|---------|-------|----------------|--------|-------|-----------|--------|---------|
|              |    | Macronutrients |       |         |         |       | Micronutrients |        |       |           |        |         |
|              |    | N              | P     | K       | Ca      | Mg    | S              | B      | Cu    | Fe        | Mn     | Zn      |
| Block        | 2  | 0.389          | 0.073 | 2.948   | 0.908   | 0.007 | 0.015          | 6.89   | 216.2 | 3243.7    | 1751.2 | 46.2    |
| Specie       | 5  | 2.743          | 0.052 | 20.78** | 39.97** | 0.476 | 0.012          | 125.02 | 277.1 | 32485.6** | 3279.9 | 480.9** |
| Residual     | 10 | 6.699          | 0.047 | 2.526   | 1.234   | 0.157 | 0.007          | 65.82  | 98.8  | 5564.2    | 1300.6 | 36.4    |
| CV(%)        |    | 18.89          | 24.47 | 14.43   | 9.24    | 16.37 | 8.10           | 15.84  | 22.59 | 17.54     | 24.93  | 30.26   |
| Overall mean |    | 13.70          | 0.89  | 11.01   | 12.02   | 2.42  | 1.03           | 51.22  | 44.00 | 425.22    | 144.67 | 19.94   |

\*\* significant at 1% probability level, and \* significant at 5% probability level by F-test

**Table S2.** Summary of the analysis of variance for macro and micronutrients in the sapwood of different eucalyptus species. Nutrients: nitrogen (N), phosphorus (P), potassium (K), calcium (Ca), magnesium (Mg), sulfur (S), boron (B), copper (Cu), iron (Fe), manganese (Mn) and zinc (Zn).

| SV           | DF | Mean Square    |        |       |          |       |        |                |       |           |          |       |
|--------------|----|----------------|--------|-------|----------|-------|--------|----------------|-------|-----------|----------|-------|
|              |    | Macronutrients |        |       |          |       |        | Macronutrients |       |           |          |       |
|              |    | N              | P      | K     | Ca       | Mg    | S      | B              | Cu    | Fe        | Mn       | Zn    |
| Block        | 2  | 0.042          | 0.31*  | 0.19  | 83.79*   | 0.79  | 0.005  | 6.50           | 0.22  | 13758.5*  | 431.2    | 84.4  |
| Specie       | 5  | 0.314          | 0.60** | 1.60  | 125.13** | 0.79  | 0.009* | 42.23*         | 3.52* | 28402.3** | 2591.8** | 245.0 |
| Residual     | 10 | 0.127          | 0.06   | 1.34  | 19.96    | 0.70  | 0.002  | 7.83           | 0.69  | 2998.8    | 230.9    | 77.2  |
| CV(%)        |    | 11.99          | 36.28  | 25.12 | 29.81    | 46.54 | 9.58   | 25.84          | 9.28  | 42.23     | 27.71    | 69.06 |
| Overall mean |    | 2.97           | 0.65   | 4.61  | 14.98    | 1.80  | 0.53   | 10.83          | 8.94  | 129.67    | 54.83    | 12.72 |

\*\* significant at 1% probability level, and \* significant at 5% probability level by F-test

**Table S3.** Summary of analysis of variance for macro and micronutrients in the bark of different eucalyptus species. Species: *E. camaldulensis* (CA) *C. citriodora* (CI), *E. saligna* (SA), *E. grandis* (GR), *E. urograndis* (UG), and *E. urophylla* (UR). Nutrients: nitrogen (N), phosphorus (P), potassium (K), calcium (Ca), magnesium (Mg), sulfur (S), boron (B), copper (Cu), iron (Fe), manganese (Mn) and zinc (Zn).

| SV           | DF | Mean Square    |        |       |          |        |         |                |       |           |          |         |
|--------------|----|----------------|--------|-------|----------|--------|---------|----------------|-------|-----------|----------|---------|
|              |    | Macronutrients |        |       |          |        |         | Micronutrients |       |           |          |         |
|              |    | N              | P      | K     | Ca       | Mg     | S       | B              | Cu    | Fe        | Mn       | Zn      |
| Block        | 2  | 0.04           | 0.04   | 0.19  | 83.79*   | 0.02   | 0.0006  | 6.50           | 0.22  | 354.1     | 431.0    | 2.72    |
| Specie       | 5  | 0.31           | 0.60** | 1.60  | 125.13** | 0.79** | 0.0099* | 42.2*          | 3.52* | 35398.0** | 2591.1** | 245.0** |
| Residual     | 10 | 0.13           | 0.01   | 1.34  | 19.96    | 0.0.03 | 0.0026  | 7.8            | 0.69  | 442.0     | 231.0    | 3.72    |
| CV(%)        |    | 11.99          | 18.40  | 25.12 | 29.81    | 10.29  | 9.58    | 25.84          | 9.28  | 15.59     | 27.71    | 15.16   |
| Overall mean |    | 2.98           | 0.66   | 4.61  | 14.99    | 1.80   | 0.53    | 10.83          | 8.94  | 135.00    | 54.83    | 12.72   |

\*\* significant at 1% probability level, and \* significant at 5% probability level by F-test

**Table S4.** Summary of the analysis of variance for volume (VOL), diameter at breast height (DAP), and total height (HT) of different eucalyptus species.

| SV           | DF | Mean Square |         |                     |
|--------------|----|-------------|---------|---------------------|
|              |    | DAP (cm)    | HT (m)  | V (m <sup>3</sup> ) |
| Block        | 2  | 8.835       | 1.458   | 0.005965            |
| Specie       | 5  | 26.332*     | 32.553* | 0.02866*            |
| Residual     | 10 | 7.124       | 6.521   | 0.006400            |
| CV(%)        |    | 14.71       | 13.30   | 33.12               |
| Overall mean |    | 18.15       | 19.20   | 0.2415              |

\*\* significant at 1% probability level, and \* significant at 5% probability level by F-test
